# Supplementary material
Source: Elsevier journal article supplement (http://addi.ehu.es/bitstream/handle/10810/20603/mmc1.xlsx)
Supplement: mmc1 [file mmc1.xlsx]

## Sheet: EX1_RS6
	F=1, S=2	w10	nw10	w30	nw30	w50	nw50	w70	nw70	w90	nw90	w110	nw110
	1	3.46333	2.71817	3.11466	1.34898	1.93484	-0.0962431	1.31618	0.779483	1.27908	-0.604585	0.67449	-0.210428
	1	2.69909	3.11466	3.46333	1.11889	3.01322	0.173858	1.52124	0.210428	0.728445	1.36035	0.240309	1.55165
	1	3.46333	2.69909	2.67036	0.884918	1.33518	0.324614	1.87588	2.00967	0.684074	-0.138327	0.967422	-0.23457
	1	3.46333	3.11466	3.46333	2.76599	1.87588	2.00967	2.29145	1.38299	1.34898	1.43286	1.39815	0.0819716
	1	3.11466	1.85958	1.82523	0.853236	2.24364	0.730592	1.63031	-0.243762	0.285946	-0.684074	0	-0.560304
	1	1.84585	1.59342	1.12475	1.49718	1.73175	1.02264	0.952267	0.0954086	0.641156	0.884918	0.544913	0.477731
	1	2.29145	2.35042	3.11466	0.210428	2.16239	-0.641156	1.10522	-0.138327	1.51611	0.210428	0.986422	0
	1	3.11466	3.11466	2.76599	1.81372	1.81372	0.67449	1.17785	0.884918	1.59342	0	1.10522	0.220299
	1	3.46333	3.11466	3.11466	1.39815	2.35042	1.08161	2.29145	0.220299	2.29145	0.210428	1.34898	0.430727
	1	3.11466	1.64191	2.76599	1.39815	3.11466	0.927837	2.76599	0.464061	2.05748	0.430727	0.477731	0.464061
	1	2.69909	2.76599	3.46333	2.05748	2.69909	0	2.35042	1.34898	1.17785	-0.210428	0.67449	0.220299
	1	3.46333	2.40615	3.06684	1.34898	1.80904	0.853236	1.58295	1.17785	0.884918	0.698029	1.44936	0.641156
	1	3.46333	3.11466	3.11466	2.35042	2.16239	2.35042	1.52124	1.76591	1.94209	0.884918	0.641156	0.420857
	1	3.46333	1.64191	3.11466	2.05748	1.10522	0.884918	1.17785	0.536694	-0.220299	0.641156	0.348756	1.17785
	1	3.46333	2.69909	3.11466	2.69909	3.11466	0.908458	3.11466	1.34898	2.24897	0.253347	1.17785	1.31618
	1	3.06684	2.00967	2.40615	0.734829	1.44936	1.39815	1.93976	0.430727	0.698029	-0.313972	1.49198	0.430727
	1	3.46333	2.76599	3.46333	2.35042	2.35042	1.39815	1.33919	1.03531	0.967422	1.34898	1.31618	1.33919
	1	2.19001	2.9523	2.69909	1.58295	2.1768	0.394157	3.01322	-0.638586	0.463775	0.139162	1.51611	-1.19544
	1	2.08042	0.967422	2.40615	1.30094	1.94209	0	1.73166	0.25583	1.98758	0.0819716	1.10522	0
	1	2.69909	2.76599	2.67036	1.33919	3.01322	0.967422	1.81372	0	2.05748	0.175645	0.618666	0.718771
	1	3.11466	1.64191	2.64012	1.59342	2.35042	0.884918	2.05748	-0.210428	1.39815	-0.348756	0.967422	-1.10522
	1	3.01322	2.69909	3.11466	2.05748	2.57329	1.17785	2.40615	0.604585	1.08161	0.560304	1.93484	0
	1	1.73166	1.38291	3.46333	1.49198	1.05717	0.90445	1.07112	1.59342	0.220299	0	0.714074	0.138327
	1	1.73166	1.33518	1.73166	0.292932	1.84585	0.8142	1.54561	-1.73166	0.430727	0.173858	2.08042	-0.464061
	1	3.11466	2.29145	2.69909	1.59342	1.52124	0.243762	1.17257	-0.415573	0.618666	1.26881	0.394157	0
	1	1.93484	2.00967	3.11466	1.31618	2.24364	1.51611	3.06684	0.114185	0.908458	0.602103	0	-0.908458
	1	3.46333	1.87588	3.06684	1.68393	3.06684	0.544913	3.11466	0.871885	0.291017	0.524401	1.40065	0.464875
	1	3.11466	2.16239	2.69909	1.81372	2.40615	0.292932	1.39815	-0.536694	0	-0.67449	-0.210428	-0.641156
	1	3.11466	1.93484	2.16239	0.464061	2.05748	0.210428	2.76599	0	1.08161	-0.788675	1.10522	-1.10522
	1	2.57329	1.11347	2.69909	0.420857	1.51611	1.84585	1.27235	0.718771	0.0403021	0.76471	2.61673	1.36035
	2	3.46333	2.40615	3.46333	-0.173858	3.11466	-0.953341	1.64191	-0.641156	1.39815	-1.10522	1.10522	0
	2	2.08042	2.09989	2.22462	-0.210428	1.68393	-1.43286	2.79923	-0.253896	2.19001	-0.727436	1.98501	-1.59197
	2	3.11466	2.69909	3.46333	-0.210428	3.11466	-1.02325	3.46333	-1.34898	3.46333	-1.11889	1.31618	-0.861455
	2	3.06684	1.27908	2.69909	1.33518	2.40615	-0.655111	2.08042	0.430727	1.14743	0.975138	1.99197	-1.46156
	2	3.06684	3.46333	3.46333	1.58295	3.46333	-0.0801848	1.43286	0.625949	1.33518	-0.253347	2.08042	-0.559184
	2	2.3026	1.10522	2.40615	1.59342	0	0.253347	1.17785	0.641156	1.04817	-0.292932	0.220299	0.173858
	2	3.46333	2.05748	2.64012	2.29145	2.1477	-0.534779	2.88201	-0.17738	3.06684	-0.777748	1.81372	-0.524401
	2	3.11466	3.46333	3.11466	-0.210428	2.76599	0	2.40615	-0.210428	0.967422	0	0.641156	0.420857
	2	3.11466	1.58295	2.76599	0.210428	1.98758	-1.03531	2.29145	-0.641156	2.35042	-0.815014	2.05748	-0.641156
	2	3.46333	2.35042	3.46333	1.10522	2.64012	0.138327	2.64012	0.220299	2.61673	-0.861455	1.33919	0.384057
	2	3.46333	2.35042	3.46333	0.430727	2.64012	-0.210428	2.16239	-0.698029	1.98758	-1.33518	1.30094	0
	2	3.46333	3.06684	3.46333	0.641156	3.46333	0	2.76599	-0.0962431	1.57201	0.114185	1.39815	-0.641156
	2	3.11466	2.3026	2.76599	1.03531	1.64191	0	1.64191	-0.0429187	1.76591	-1.59342	0.0699044	-1.17257
	2	3.11466	2.24364	3.11466	-0.291017	2.76599	-0.967422	0.220299	0.788675	0.641156	-0.348756	0.0936732	0.90445
	2	3.06684	3.46333	2.35042	1.34898	2.64012	0	1.01806	-0.506694	0.559702	0.220299	-0.394157	-1.05717
	2	3.46333	2.76599	2.76599	1.39815	2.69909	0	3.11466	-0.430727	2.05748	-1.17785	1.08161	0.114185
	2	3.11466	3.11466	2.40615	0.730592	2.64012	0.253347	2.64012	-0.884918	1.04817	0.394157	1.87588	-1.25721
	2	3.06684	1.36602	1.03531	0.506694	2.64012	0.462941	-0.0819716	0.168743	1.08161	0.0609112	-0.534779	-0.410894
	2	2.35042	2.76599	2.69909	1.38299	2.69909	0.464061	0.243762	1.59342	1.08161	-0.210428	0.0962431	0
	2	3.11466	2.69909	2.76599	0.641156	2.00967	-0.430727	1.17785	-0.420857	1.17785	-0.243762	1.17785	-1.10522
	2	3.46333	3.46333	3.46333	3.06684	1.51304	1.81372	1.33919	0.544913	0.788675	0	-0.789913	-0.31413
	2	2.25606	1.33919	2.64012	-0.90445	1.98501	-1.68324	2.9523	-0.524401	2.16239	-0.684074	1.70163	-0.757151
	2	3.46333	2.3026	3.11466	1.31618	3.06684	-0.544913	1.02325	0.220299	0.220299	-0.641156	0.4904	-0.23457
	2	3.11466	1.64191	2.35042	-0.536694	2.69909	-0.560304	1.64191	-0.430727	0.641156	0.641156	0.464061	0.0962431
	2	3.11466	3.11466	2.40615	2.00967	1.81372	0.884918	1.38299	1.38299	1.59342	1.73166	-0.464061	0.67449
	2	2.18806	1.49182	1.04817	0.210428	1.75493	-0.67449	1.22064	0.718771	1.20917	-0.294198	0.271053	-0.0936732
	2	3.11466	1.39815	2.16239	0.243762	1.59342	0.325734	2.05748	0.536694	0.464061	0	0.641156	0.220299
	2	3.46333	3.11466	3.06684	2.33625	2.40615	0.967422	0.325734	1.28155	1.20726	0.698029	0.477731	0.650524
	2	3.46333	3.46333	2.24897	1.02325	1.80904	0.638586	2.12317	1.60633	0.462941	1.26453	1.33483	0.8142
	2	3.11466	2.05748	2.69909	1.34898	3.46333	0.220299	1.38299	0.464061	0.697511	-0.114185	0.955128	0.210428

## Sheet: EX2_RS4
										For Correl Computation
	w20	w40	w60	w80	nw20	nw40	nw60	nw80		W (Mean)	NW (Mean)	W-NW
	3.29915	3.66783	2.90149	1.56997	0.93818	-0.275672	0.112759	-0.989032		2.85961	-0.0534413	2.91305
	3.66783	2.61186	1.90919	1.83134	3.00217	1.67672	0.706577	0.169695		2.50505	1.38879	1.11626
	3.18195	2.45684	1.2077	0.757969	2.56866	1.75026	0.482297	0.819296		1.90112	1.40513	0.495988
	3.335	1.86719	2.00349	1.19442	2.61186	1.56997	0.861455	0.684074		2.10003	1.43184	0.668186
	3.335	2.85399	1.93181	0.93818	1.85921	0.385936	-0.971651	-0.634438		2.26475	0.159764	2.10498
	3.335	2.26464	2.12401	0.706577	0.706577	-0.336999	-2.12401	-1.05365		2.10756	-0.702022	2.80958
	3.335	2.34271	0.857425	0.706577	1.89596	-0.137346	0	0.256819		1.81043	0.503859	1.30657
	3.32797	3.29915	2.07149	0.93313	2.30686	0.680134	0.916328	0.311204		2.40793	1.05363	1.3543
	3.335	3.335	1.90241	1.85921	2.94469	0.527286	0.796834	0.17738		2.60791	1.11155	1.49636
	3.66783	2.57601	0.996676	1.22237	1.05365	0.757969	-0.209729	0		2.11572	0.400473	1.71525
	3.66783	2.5328	1.83391	1.05997	2.12401	0.209021	0.22569	0.051564		2.27363	0.652572	1.62106
	3.66783	2.34271	1.5415	1.46455	1.5415	0.369579	0.684074	-0.684074		2.25415	0.477769	1.77638
	3.335	2.94469	2.17463	0.344388	1.4508	-0.430727	-0.502402	-0.251921		2.19968	0.0664382	2.13324
	3.335	2.34271	2.26464	1.58474	1.5415	0.876273	-0.0569769	0.680044		2.38177	0.76021	1.62156
	3.00217	3.29915	1.50109	1.21189	1.36412	-0.0569769	-0.930759	0		2.25357	0.0940956	2.15948
	3.00217	3.29915	2.90149	1.75443	1.71858	0	-0.706577	-0.336999		2.73931	0.168751	2.57056
	2.96632	3.29915	2.44615	1.94894	1.10522	0.0733347	-0.139162	-1.39622		2.66514	-0.0892085	2.75435
	2.34271	1.93181	1.93181	2.26464	1.46455	-0.17738	0.169695	-0.169695		2.11774	0.321792	1.79595
	4.2824	3.335	2.29272	1.75443	1.5415	0.192198	0.538292	0.506694		2.91614	0.694671	2.22147
	2.94469	2.45684	0.336999	0.167303	2.61186	1.68324	2.17834	0.17738		1.47646	1.66271	-0.186248
	2.03118	1.93181	1.46613	0.641156	1.5415	0.269548	-0.0429187	-0.680134		1.51757	0.271998	1.24557
	3.335	2.22154	2.34271	1.05365	2.22154	1.05365	0.588274	-0.17738		2.23823	0.921523	1.3167
	3.43902	2.94469	2.2374	2.06982	2.34271	0.377033	0.32239	0.639757		2.67273	0.920472	1.75226
	3.00217	2.45684	1.95239	0.684074	2.12401	0.925273	1.05365	0.757969		2.02387	1.21523	0.808643
	3.52017	3.335	3.335	1.7337	1.5415	-0.54824	-0.861455	0.17738		2.98097	0.0772961	2.90367
	3.66783	1.95239	1.27235	-0.112759	1.95239	0.514379	0.0733347	0.312602		1.69495	0.713177	0.981776
	3.41559	2.61186	2.92716	1.6905	2.94469	1.95239	2.25687	0.841621		2.66128	1.99889	0.662384
	3.335	3.335	2.06703	1.15774	2.49365	-0.925273	-0.220299	0.250715		2.4737	0.399698	2.074
	3.66783	3.66783	2.96632	2.17834	1.19442	-0.684074	-1.0406	-1.63634		3.12008	-0.541647	3.66173
	3.66783	3.66783	1.8617	2.93047	2.03118	0	-0.498257	-1.90241		3.03196	-0.0923712	3.12433
	3.335	3.335	2.94469	1.02712	0.17738	-2.08726	-1.09497	-1.27235		2.66045	-1.0693	3.72975
	3.335	1.24585	1.5415	0.649601	1.8568	0.706577	0	0.576535		1.69299	0.784979	0.908009
	3.335	2.61186	1.68324	0.514379	1.95239	0	0.17738	-0.622926		2.03612	0.376712	1.65941
	2.96632	2.5328	1.47688	0.430727	2.13085	1.83134	1.11077	1.47688		1.85168	1.63746	0.214223
	3.53792	2.45684	2.12401	1.6905	0.347076	0	0.192198	0.112759		2.45232	0.163008	2.28931
	3.335	3.335	2.61186	1.7337	2.34271	1.7337	0.336999	0		2.75389	1.10335	1.65054
	2.90149	2.29272	2.44615	1.41456	2.08765	0.209729	-0.282455	-0.38994		2.26373	0.406245	1.85749
	2.5328	1.89596	2.08816	1.06835	1.11663	-0.0727251	-0.137346	-0.622926		1.89632	0.0709095	1.82541
	3.60125	3.66783	2.22154	1.46455	2.12401	-0.706577	-0.61074	-0.336999		2.73879	0.117424	2.62137
	3.335	3.29915	2.90149	1.75862	2.45684	-0.854502	-0.525888	-0.276571		2.82356	0.19997	2.62359
	2.85399	2.48531	0.61074	0.546119	1.90919	0	0.0646209	0.641156		1.62404	0.653742	0.970298
	3.66783	3.29915	1.19442	0.502402	1.22237	0.136296	0.0646209	0.292932		2.16595	0.429054	1.7369
	3.335	2.52116	2.34271	1.84709	2.25687	0.349906	0.180012	0.586054		2.51149	0.843211	1.66828
	2.94469	2.94469	1.4983	0.930759	1.93181	0.282455	0.410894	0		2.07961	0.65629	1.42332
	3.00028	1.02163	1.40415	0.263664	0.925273	-0.192198	-0.0963606	-0.169695		1.42243	0.116755	1.30568
	2.30686	3.21691	1.52264	1.17185	-2.18267	-0.604585	-1.31189	-1.38618		2.05456	-1.37133	3.4259
	2.56866	2.26464	1.86719	0.275932	0.538292	0.745063	0.501622	0.584456		1.74411	0.592358	1.15175
	3.335	2.48531	-0.0954086	0.819968	2.13085	0.661609	0.18021	-0.0646209		1.63622	0.727012	0.909206
	2.48531	2.08726	1.32092	0.916328	0.85933	-0.67449	-0.88377	-0.153671		1.70245	-0.21315	1.9156
	3.66783	2.45684	3.335	1.24585	3.00217	1.5415	0.861455	0.312602		2.67638	1.42943	1.24695
	3.66783	2.62555	2.90149	0.433359	1.90919	1.02008	-0.180012	0.0429187		2.40706	0.698044	1.70901
	2.96632	3.21691	2.44615	1.31346	2.57023	0	-0.369579	-0.336999		2.48571	0.465913	2.0198

## Sheet: EX2_PR
						For Correl Computation
	w A	w R	nw A	nw R		R-A(W)	R-A(NW)	W-NW
	6.63333	5.71667	7.76667	5.43333		-0.916667	-2.33333	1.41667
	6.26667	4.41667	7.43333	6.38333		-1.85	-1.05	-0.8
	6.73333	5.98333	6.53333	4.28333		-0.75	-2.25	1.5
	6.18333	5.25	5.46552	5.38983		-0.933333	-0.0756867	-0.857647
	7.5	7.26667	7.48333	6.95		-0.233333	-0.533333	0.3
	6.58333	5.93333	6.7	5.93333		-0.65	-0.766667	0.116667
	7.23333	6.86667	6.73333	5.75926		-0.366667	-0.974074	0.607407
	7.31667	7.10169	7.95	7.74576		-0.214972	-0.204237	-0.0107345
	6.8	6.08475	6.58333	6.43333		-0.715254	-0.15	-0.565254
	7.01667	6.66667	6.33333	5.18333		-0.35	-1.15	0.8
	6.85	6.45	7.16071	6.06667		-0.4	-1.09405	0.694048
	7.58333	6.98333	7.68333	7.38333		-0.6	-0.3	-0.3
	6.77586	6.23729	6.84483	6.41071		-0.538574	-0.434113	-0.104461
	6.03333	5.25862	5.53333	5.06667		-0.774713	-0.466667	-0.308046
	6.85	6.4	6.2	4.76667		-0.45	-1.43333	0.983333
	7.6	6.28333	7.31667	5.6		-1.31667	-1.71667	0.4
	6.5	6.11667	6.13333	5.16949		-0.383333	-0.963842	0.580508
	6.75	6.05	6.71667	6.53333		-0.7	-0.183333	-0.516667
	7.16667	6.06667	7.46667	5.08333		-1.1	-2.38333	1.28333
	6.06667	4.88136	6.41667	5.85		-1.18531	-0.566667	-0.618644
	5.30508	4.94915	5.65	5.10169		-0.355932	-0.548305	0.192373
	6.45	4.65	6.76667	5.95		-1.8	-0.816667	-0.983333
	7.81667	6.38333	7.58333	5.91667		-1.43333	-1.66667	0.233333
	7.51667	7.13333	7.06667	6.46667		-0.383333	-0.6	0.216667
	7.46667	7.38333	7.16667	6.54237		-0.0833333	-0.624294	0.54096
	6.7	5.8	6.11667	5.8		-0.9	-0.316667	-0.583333
	7.53333	5.86667	7.23333	6.1		-1.66667	-1.13333	-0.533333
	7.08333	5.9	6.62712	4.71667		-1.18333	-1.91045	0.727119
	7.8	7.26667	7.52542	6.62712		-0.533333	-0.898305	0.364972
	4.94915	4.31667	6.75	5.96667		-0.632486	-0.783333	0.150847
	6.41667	5.7	6.35	4.58333		-0.716667	-1.76667	1.05
	6.2	5.15	6.61667	5.38333		-1.05	-1.23333	0.183333
	6.86207	6.9661	6.6	5.66667		0.104033	-0.933333	1.03737
	5.45763	5.13333	5.21667	5.11667		-0.324294	-0.1	-0.224294
	6.98333	6.08333	6.16949	5.37255		-0.9	-0.796943	-0.103057
	7.56667	5.96667	6.68333	4.63333		-1.6	-2.05	0.45
	6.18333	5.80702	6.08333	5.8		-0.376316	-0.283333	-0.0929825
	6.96667	6.98333	6.75	6.05172		0.0166667	-0.698276	0.714943
	7.25	6.83333	6.58333	5.94915		-0.416667	-0.634181	0.217514
	6.41667	5.0678	6.50877	4.45763		-1.34887	-2.05114	0.702275
	7.33333	6.76667	6.71667	6.21667		-0.566667	-0.5	-0.0666667
	6.66667	6.63333	6.23333	5.6		-0.0333333	-0.633333	0.6
	7.33898	6.33333	6.81667	5.91667		-1.00565	-0.9	-0.10565
	7.3	6.75	7.18333	7.01667		-0.55	-0.166667	-0.383333
	5.93333	4.98333	5.7	6.16667		-0.95	0.466667	-1.41667
	7.25	7.2	7.4	6.78333		-0.05	-0.616667	0.566667
	6.18333	5.95	6.21667	4.9322		-0.233333	-1.28446	1.05113
	7.13333	5.79661	7.46667	6.88136		-1.33672	-0.585311	-0.751412
	7.4	7.1	6.49153	4.84483		-0.3	-1.6467	1.3467
	7.35	4.76667	7.23333	4.98305		-2.58333	-2.25028	-0.333051
	7.46552	7.13793	7.3	6.73333		-0.327586	-0.566667	0.23908
	7.88333	7.75	7.81667	6.84746		-0.133333	-0.969209	0.835876

## Sheet: CORREL
	W-NW
	RS4	PR		SUMMARY OUTPUT
	2.91305	1.41667
	1.11626	-0.8		Regression Statistics
	0.495988	1.5		Multiple R	0.428078
	0.668186	-0.857647		R Square	0.183251
	2.10498	0.3		Adjusted R Square	0.166916
	2.80958	0.116667		Standard Error	0.769176
	1.30657	0.607407		Observations	52
	1.3543	-0.0107345
	1.49636	-0.565254		ANOVA
	1.71525	0.8			df	SS	MS	F	Significance F
	1.62106	0.694048		Regression	1	6.63711	6.63711	11.2183	0.00154666
	1.77638	-0.3		Residual	50	29.5816	0.591632
	2.13324	-0.104461		Total	51	36.2187
	1.62156	-0.308046
	2.15948	0.983333			Coefficients	Standard Error	t Stat	P-value	Lower 95%	Upper 95%	Lower 95.0%	Upper 95.0%
	2.57056	0.4		Intercept	1.65792	0.111455	14.8753	5.39127e-20	1.43406	1.88179	1.43406	1.88179
	2.75435	0.580508		PR	0.538963	0.160915	3.34938	0.00154666	0.215757	0.86217	0.215757	0.86217
	1.79595	-0.516667
	2.22147	1.28333
	-0.186248	-0.618644
	1.24557	0.192373
	1.3167	-0.983333
	1.75226	0.233333
	0.808643	0.216667
	2.90367	0.54096
	0.981776	-0.583333
	0.662384	-0.533333
	2.074	0.727119
	3.66173	0.364972
	3.12433	0.150847
	3.72975	1.05
	0.908009	0.183333
	1.65941	1.03737
	0.214223	-0.224294
	2.28931	-0.103057
	1.65054	0.45
	1.85749	-0.0929825
	1.82541	0.714943
	2.62137	0.217514
	2.62359	0.702275
	0.970298	-0.0666667
	1.7369	0.6
	1.66828	-0.10565
	1.42332	-0.383333
	1.30568	-1.41667
	3.4259	0.566667
	1.15175	1.05113
	0.909206	-0.751412
	1.9156	1.3467
	1.24695	-0.333051
	1.70901	0.23908
	2.0198	0.835876
